# Supplementary material
Source: PubMed Central journal article supplement (PMC3867232)

## Supporting Information

### Structural Destabilization of DNA Duplexes Containing Single Base Lesions Investigated by Nanopore Measurements.

Qian Jin, Aaron M. Fleming, Yun Ding, Cynthia J. Burrows, and Henry S. White

Department of Chemistry, University of Utah, 315 South 1400 East, Salt Lake City, Utah 84112-0580 United States

| Contents                                                                                                                                                                                                   | Page |
|------------------------------------------------------------------------------------------------------------------------------------------------------------------------------------------------------------|------|
| SI Table 1. Melting temperatures ( $T_m$ ) for the duplexes employed in the main text.                                                                                                                     | SI 2 |
| SI Figure 1. Histogram of current blockage levels for a duplex containing both 3'- and 5'-overhangs.                                                                                                       | SI 3 |
| SI Figure 2. Unzipping time constant $\tau$ at -120 mV as a function of melting temperature $T_m$ for the 65mer-17mer duplexes containing different X:Y base pairs (X = G, OG, Sp, or Gh; Y = C, A, or D). | SI 4 |

SI Table 1. Melting temperatures ( $T_m$ ) for the duplexes employed in the main text.

65-mer: 5'-(T)<sub>23</sub>-TTGGAGCTG**X**TGGCGTAGG-(T)<sub>23</sub>

17-mer: 3'-ACCTCGAC**Y**ACCGCATC

| <b>X:Y</b> | $T_m$ (°C) |
|------------|------------|
| G:C        | 70.3 ± 0.4 |
| OG:C       | 69.3 ± 0.3 |
| OG:D       | 68.7 ± 0.5 |
| OG:A       | 67.8 ± 0.4 |
| G:D        | 63.8 ± 0.3 |
| G:A        | 62.6 ± 0.8 |
| Sp:D       | 60.9 ± 1.4 |
| Gh:D       | 58.3 ± 0.4 |
| Sp:A       | 57.5 ± 0.4 |
| Gh:A       | 57.3 ± 0.4 |
| Sp:C       | 57.1 ± 1   |
| Gh:C       | 55.9 ± 0.5 |

SI Figure 1. Histogram of current blockage levels for a duplex containing both 3'- and 5'-overhangs. The 65mer-17mer duplex can thread into the  $\alpha$ -HL channel from either the 3'-(T)<sub>23</sub> overhang, or the 5'-(T)<sub>24</sub> overhang, generating distinct current blockage levels. (Left) Example histogram of current blockage levels ( $I$ ) generated by the duplex containing X:Y = OG:C. (Right) Event density for the current blockage level ( $I$ ) of the OG:C duplex as a function of unzipping duration ( $t$ ). Previous work of our lab (Jin, Q., Fleming, A. M., Burrows, C. J., White, H. S. (2012) Unzipping kinetics of duplex DNA containing oxidized lesions in an  $\alpha$ -hemolysin nanopore. *J. Am. Chem. Soc.* 134, 11006-11010.) have demonstrated that 3'-threading generates a deeper blockade than 5'-threading, and that the unzipping time constant ( $\tau$ ) via 3' and 5' entry are different.

65-mer Target 5'-(T)<sub>24</sub>-TGGAGCTG**X**TGGCGTAGG-(T)<sub>23</sub>  
 17-mer Probe 3'-ACCTCGAC**Y**ACCGCATC

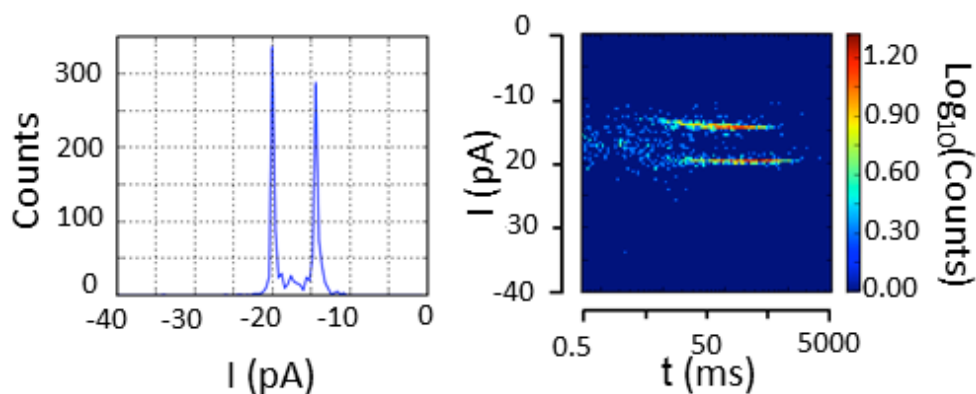

SI Figure 2. Unzipping time constant  $\tau$  at -120 mV as a function of melting temperature  $T_m$  for the 65mer-17mer duplexes containing different X:Y base pairs (X = G, OG, Sp, or Gh; Y = C, A, or D). Data shown for both 3' and 5' entry. Only the unzipping time constants for the Type I model are plotted. The base pairs corresponding to different  $T_m$  values are listed in SI Table 1.

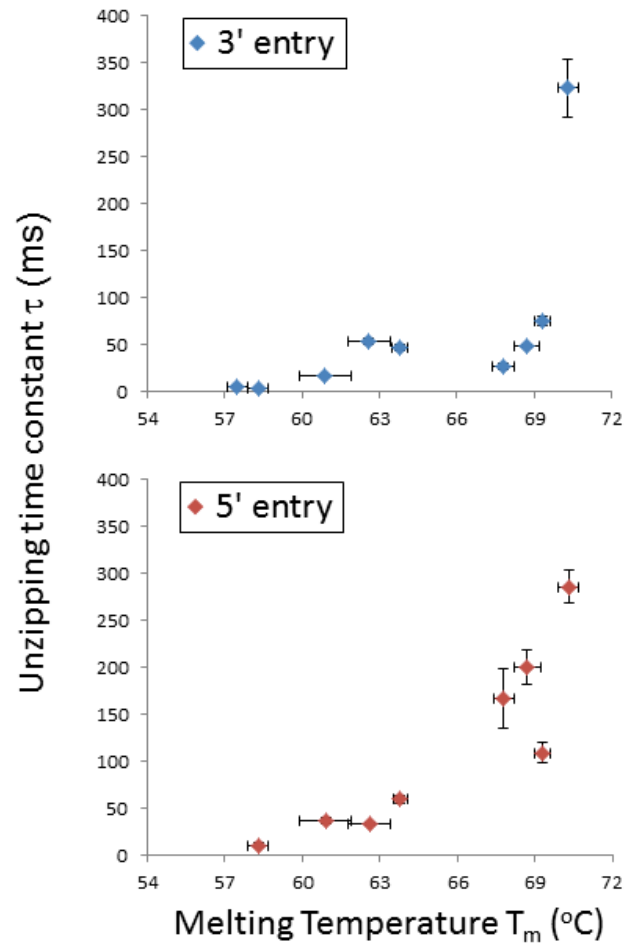

Supplement: NIHMS536740-supplement-1_si_001.pdf [file NIHMS536740-supplement-1_si_001.pdf]
